# Supplementary material for: Dissection of the regulatory role for the N-terminal domain in Candida albicans protein phosphatase Z1
Source: PLoS One. 2019 Feb 1;14(2):e0211426. doi: 10.1371/journal.pone.0211426 (PMC6358084; doi:10.1371/journal.pone.0211426)
Supplement: S3 Fig — The amino acid sequences that were investigated by Clotet et al., 1996, Minhas et al., 2012, and in the present work were aligned by the Clustal Omega multiple sequence alignment tool (https://www.ebi.ac.uk/Tools/msa/clustalo/). Green background indicates deletions and pink highlights point mutations. Yellow insert marks the deletion in ScPpz1 that was studied by Minhas et al, 2012. The light blue line above the sequences labels the C-terminal domain of CaPpz1, dark blue extensions mark the limits of the same domain in ScPpz1. Stars under the sequences indicate amino acid residue identities, spot show similarities. (PDF) [file pone.0211426.s007.pdf]

|        |                                                               |                                  |                          |              |                      |                    |
|--------|---------------------------------------------------------------|----------------------------------|--------------------------|--------------|----------------------|--------------------|
| ScPpz1 | MCNSSSKSSKKDSHSN                                              | SSSRNPRPQVSR                     | TETSHSVKSAKSN            | SSRSRRSLPS   | SSTNTNS              | 60                 |
| CaPpz1 | MGSNSSKSA                                                     | -----                            | PTLQSRSD                 | TNNSTRST     | RSNRSIRSRRS          | SISSIKDSQQ         |
| DhPpz1 | MGNSSSKPKD                                                    | -----                            | LRGSPLSRTDTGNSAK         | ---          | SSRSIRSRI            | MSRDDNSTSG         |
|        | **..***                                                       |                                  | :.***:.*:                | *.*          | *** *                | : . :              |
| ScPpz1 | NVPDPSTPSKPNL                                                 | -----                            | EVNHQRHSSHTNRYHFPSS      | --           | SHSHSNSQNELLTTPSSSST | 112                |
| CaPpz1 | ---                                                           | Q-----                           | -----                    | -----        | SDSQQQ               | --Q                |
| DhPpz1 | ---                                                           | SPKTGSKATSRKN                    | SSSTSLNNMNSSSH           | SMNIPING     | NNSAHSNNN            | SSANLSNFSNLSI      |
|        | .                                                             |                                  |                          |              | :                    | ..                 |
| ScPpz1 | KRPSTSRSSSYNTKAAADLPPSMIQMEPKSPILKTNNSSSTHVSKHKSSYSSTYYENALTD |                                  |                          |              |                      | 172                |
| CaPpz1 | QEEEEQSQSQSQ                                                  | QRPQPI                           | LSRNNSATSENPI            | LIRRNTNETLQ  | TPNFSD               | -----T-----        |
| DhPpz1 | HKNPSNQHSNNNFNLPP                                             | ---                              | SMIQVEPKEPILIRRNTGPDGEDT | PLSPKNHSFNS  | ---                  | 155                |
|        | ::                                                            | .: . . . :                       | .                        | :***         | .*:                  | . *                |
| ScPpz1 | DDNDDKDNDISHTKRFSRSSN                                         | SRPSSIRSGSVSRRKSDVT              | HEEPNNGSYSSNNQENYLVO     |              |                      | 232                |
| CaPpz1 | -----                                                         | LSPHS                            | --HSQQQQQQPGS            | PLST         | -----                | SMNGNTISR          |
| DhPpz1 | -----                                                         | NSPHL                            | --ASSFDNSNPS             | -----        | -----                | SNPSNNISR          |
|        |                                                               | *                                | *                        | .: . . *     |                      | * : :              |
| ScPpz1 | ALTRSNSHASSLHSRKSSFGSDGNTAYSTPLNSPGLSKLTDHSGEYFTSNSTSSLNHHSS  |                                  |                          |              |                      | 292                |
| CaPpz1 | TST                                                           | -----                            | NHSI                     | -----        | IST                  | -----              |
| DhPpz1 | TST                                                           | -----                            | NHSH                     | -----        | HSGS                 | --INNYPLSPQP       |
|        | :                                                             | *                                | **                       | *            |                      |                    |
| ScPpz1 | RDYPSKHISNDDDIENSSQLSNIHA                                     | SMENVNDKNNNITD                   | SKKDPNEEFND              | IMQSSGNKN    |                      | 352                |
| CaPpz1 | -----                                                         | SHKSSSQ                          | -----                    | Q-----       | -----                | SNLPLKKETTS        |
| DhPpz1 | KDL                                                           | -----                            | QEDTSKNFDSQ              | -----        | SLNE                 | -----NRNKDVSINNLSH |
|        |                                                               | .                                | : . **                   | .            | *                    | : . . .            |
| ScPpz1 | APKKFKKPIDIDETIQKLLDAGYAAKRTKNVCLKNNEILQICIKAREIFLSQPSLLELSP  |                                  |                          |              |                      | 412                |
| CaPpz1 | SLSTNSNTIDIDSLIDKLLNAGFSGKRTKNVCLKNTEIELICASAREIFLSQPSLLELAP  |                                  |                          |              |                      | 223                |
| DhPpz1 | NESDDSGSIDIENLIQRLLDAGYSGKKT                                  | SVCLKNHEIQ                       | LICAKARNILL              | SQPSLLELSP   |                      | 306                |
|        | .                                                             | .                                | ***: .                   | *:***:***: . | *:***:***: *         | **                 |
| ScPpz1 | PVKIVGDVHGQYGDLLRLFTKCGFPPSSNYLFLGDYVDR                       | RGKQSLETILL                      | LLFCYKIKYPEN             |              |                      | 472                |
| CaPpz1 | PVKVVGDVHGQYHDLIRIFSKCGFPPKTNLYLFLGDYVDR                      | RGKQSLETILL                      | LLFCYKIKYPEN             |              |                      | 283                |
| DhPpz1 | PVKVVGDVHGQYGDLLIRIFTKCGFPPQTNYLFLGDYVDR                      | RGKQSLETILL                      | LLFCYKIKYPEN             |              |                      | 366                |
|        | ***:*****                                                     | **:*:***:*****                   | :*****                   | *****        | *****                | *****              |
| ScPpz1 | FLLRGNHECANVTRVYGFYDECKRRCN                                   | IKIWKTFIDTFNTLPIAAIVAGKIFCVHGGLS |                          |              |                      | 532                |
| CaPpz1 | FLLRGNHECANVTRVYGFYDECKRRCN                                   | IKTWKLFIDTFNTLPIAAIVAGKIFCVHGGLS |                          |              |                      | 343                |
| DhPpz1 | FLLRGNHECANVTRVYGFYDECKRRCN                                   | IKTWKLFIDTFNTLPIAAIVAGKIFCVHGGLS |                          |              |                      | 426                |
|        | *****                                                         | *****                            | *****                    | *****        | *****                | *****              |
| ScPpz1 | PVLNSMDEIRHVVRPTDVPDFGLINDLLWSDPTDSPNEWEDNERGVSYCYNKVAINKFLN  |                                  |                          |              |                      | 592                |
| CaPpz1 | PVLNSMDEIRNIARPTDVPDFGLINDLLWSDPADTINNEWEDNERGVSYVFSKVAINKFLS |                                  |                          |              |                      | 403                |
| DhPpz1 | PVLNSMEEIRNIARPTDVPDFGLINDLLWSDPADTMNEWEDNERGVSYVFSRVAINKFLQ  |                                  |                          |              |                      | 486                |
|        | *****:***: .                                                  | *****:*****                      | : *****                  | *****        | : *****              | .                  |
| ScPpz1 | KFGFDLVCRAHMVVEDGYEFFNDRSLVTVFSAPNYCGEFDNWGAVMSVSEGLLCSFELLD  |                                  |                          |              |                      | 652                |
| CaPpz1 | KFNFDLVCRAHMVVEDGYEFFNDRTLVTVFSAPNYCGEFDNWGAVMGVSEDLLCSFELLD  |                                  |                          |              |                      | 463                |
| DhPpz1 | KFGFDLVCRAHMVVEDGYEFFNDRTLVTVFSAPNYCGEFDNWGAVMSVSEGLLCSFELLD  |                                  |                          |              |                      | 546                |
|        | **                                                            | *****                            | *****                    | *****        | **                   | *****              |
| ScPpz1 | PLDSAALKQVMKKGRQERKLANQQQQMMETSITNDNESQQ                      |                                  |                          |              |                      | 692                |
| CaPpz1 | PLDSAALKQVMKKEKQERKKST                                        | -----                            |                          |              |                      | 485                |
| DhPpz1 | PLDSIALKQVMKKGKEERKNAQLQOS                                    | -----                            |                          |              |                      | 572                |
|        | ****                                                          | *****                            | :***                     | :            |                      |                    |
